# Supplementary material for: Evaporation Driven Hydrovoltaic Generator Based on Nano-Alumina-Coated Polyethylene Terephthalate Film
Source: MDPI journal article supplement (doi:10.3390/polym15204079), 2023-10-13
Supplement: s1 [file s1]

## **Supplementary Materials**

# **Evaporation Driven Hydrovoltaic Generator Based on Nano-alumina Coated Polyethylene Terephthalate Film**

Shipu Jiao <sup>1</sup>, Yihao Zhang <sup>1</sup>, Yang Li <sup>1</sup>, Bushra Maryam <sup>1</sup>, Shuo Xu <sup>1</sup>, Wanxin Liu <sup>1</sup>, Miao Liu <sup>1</sup>, Jiaxuan Li <sup>1</sup>, Xu Zhang <sup>1</sup> and Xianhua Liu <sup>1\*</sup>

<sup>a</sup>School of Environmental Science and Engineering, Tianjin University, Tianjin, 300354, PR China.

\*Corresponding author. Tel.: +86-22-85356239; E-mail: lxh@tju.edu.cn

## **Table of contents**

**Figure S1.** Preparation of the hydrovoltaic generator.

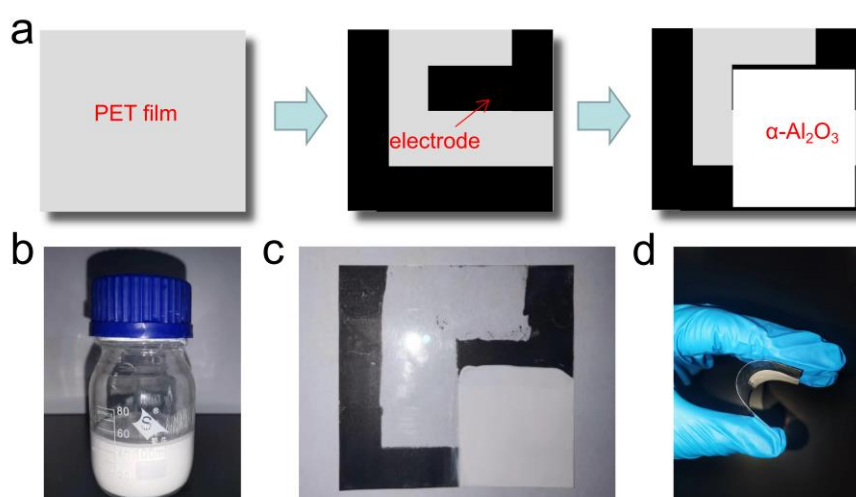

**Figure S1.** Preparation of the hydrovoltaic generator. (a) Schematic diagram of the preparation process of a hydrovoltaic generator; (b) Dispersion liquid made by dispersing alumina nanoparticles in ethanol; (c) Photo of an  $\text{Al}_2\text{O}_3$ -based hydrovoltaic generator; (d) A photo showing the excellent bending performance of the hydrovoltaic generator.
